# Supplementary material for: A comprehensive genome-wide profiling comparison between HBV and HCV infected hepatocellular carcinoma
Source: PubMed Central journal article supplement (PMC6819460; doi:10.1186/s12920-019-0580-x), 2019-10-28
Supplement: 12920_2019_580_MOESM1_ESM.pdf [file 12920_2019_580_MOESM1_ESM.pdf]

Table S1 Clinical Dataset of HCC

| bcr patient barcode | viral hepatitis serology                                                   | tumor tissue site | bcr patient barcode | viral hepatitis serology           | tumor tissue site |
|---------------------|----------------------------------------------------------------------------|-------------------|---------------------|------------------------------------|-------------------|
| CDE ID:2003301      | CDE ID:4395982                                                             | CDE ID:3427536    | CDE ID:2003301      | CDE ID:4395982                     | CDE ID:3427536    |
| TCGA-2Y-A9GX        | Hepatitis B Surface Antigen HBV Surface Antibody HBV Core Antibody         | Liver             | TCGA-2Y-A9H1        | Hepatitis C Antibody               | Liver             |
| TCGA-5C-AAPD        | HBV Surface Antibody                                                       | Liver             | TCGA-2Y-A9HA        | Hepatitis C Antibody               | Liver             |
| TCGA-BC-A10W        | Hepatitis B Surface Antigen                                                | Liver             | TCGA-2Y-A9HB        | Hepatitis C Virus RNA HCV Genotype | Liver             |
| TCGA-BD-A2L6        | Hepatitis B Surface Antigen HBV Surface Antibody HBV Core Antibody         | Liver             | TCGA-FV-A4ZQ        | Hepatitis C Virus RNA              | Liver             |
| TCGA-BD-A3ER        | Hepatitis B Surface Antigen HBV Surface Antibody HBV Core Antibody         | Liver             | TCGA-GJ-A30U        | Hepatitis C Antibody               | Liver             |
| TCGA-DD-A113        | Hepatitis B Surface Antigen HBV Surface Antibody HBV Core Antibody         | Liver             | TCGA-K7-A5RF        | Hepatitis C Virus RNA              | Liver             |
| TCGA-DD-A115        | Hepatitis B Surface Antigen HBV Surface Antibody HBV Core Antibody         | Liver             | TCGA-K7-A5RG        | HCV Genotype                       | Liver             |
| TCGA-DD-A116        | Hepatitis B Surface Antigen HBV Surface Antibody HBV Core Antibody         | Liver             | TCGA-K7-A6G5        | HCV Genotype                       | Liver             |
| TCGA-DD-A118        | Hepatitis B Surface Antigen HBV Surface Antibody HBV Core Antibody         | Liver             | TCGA-KR-A7K0        | Hepatitis C Antibody               | Liver             |
| TCGA-DD-A119        | Hepatitis B Surface Antigen HBV Surface Antibody HBV Core Antibody         | Liver             | TCGA-KR-A7K2        | HCV Genotype                       | Liver             |
| TCGA-DD-A11A        | Hepatitis B Surface Antigen HBV Core Antibody                              | Liver             | TCGA-MI-A75E        | HCV Genotype                       | Liver             |
| TCGA-DD-A11B        | Hepatitis B Surface Antigen HBV Surface Antibody HBV Core Antibody         | Liver             | TCGA-MI-A75G        | HCV Genotype                       | Liver             |
| TCGA-DD-A11C        | Hepatitis B Surface Antigen HBV Surface Antibody HBV Core Antibody         | Liver             | TCGA-MI-A75H        | HCV Genotype                       | Liver             |
| TCGA-DD-A1EA        | Hepatitis B Surface Antigen HBV Surface Antibody HBV Core Antibody HBV DNA | Liver             | TCGA-RG-A7D4        | Hepatitis C Antibody               | Liver             |
| TCGA-DD-A1EB        | Hepatitis B Surface Antigen HBV Surface Antibody HBV Core Antibody         | Liver             | TCGA-WX-AA44        | Hepatitis C Antibody               | Liver             |
| TCGA-DD-A1ED        | Hepatitis B Surface Antigen HBV Surface Antibody HBV Core Antibody         | Liver             | TCGA-WX-AA46        | Hepatitis C Antibody               | Liver             |
| TCGA-DD-A1EF        | Hepatitis B Surface Antigen HBV Surface Antibody HBV Core Antibody         | Liver             | TCGA-WX-AA47        | Hepatitis C Antibody               | Liver             |
| TCGA-DD-A1EG        | Hepatitis B Surface Antigen                                                | Liver             | TCGA-ZP-A9D2        | Hepatitis C Virus RNA              | Liver             |
| TCGA-DD-A1EH        | Hepatitis B Surface Antigen HBV Surface Antibody HBV Core Antibody HBV DNA | Liver             |                     |                                    |                   |
| TCGA-DD-A1EI        | Hepatitis B Surface Antigen HBV DNA                                        | Liver             |                     |                                    |                   |
| TCGA-DD-A1EJ        | Hepatitis B Surface Antigen HBV Surface Antibody HBV Core Antibody         | Liver             |                     |                                    |                   |
| TCGA-DD-A1EK        | Hepatitis B Surface Antigen HBV Surface Antibody HBV Core Antibody         | Liver             |                     |                                    |                   |
| TCGA-DD-A1EL        | Hepatitis B Surface Antigen HBV Surface Antibody HBV Core Antibody HBV DNA | Liver             |                     |                                    |                   |
| TCGA-DD-A39X        | Hepatitis B Surface Antigen HBV Surface Antibody                           | Liver             |                     |                                    |                   |
| TCGA-DD-A39Y        | Hepatitis B Surface Antigen HBV Surface Antibody HBV Core Antibody         | Liver             |                     |                                    |                   |
| TCGA-DD-A3A6        | Hepatitis B Surface Antigen HBV Surface Antibody HBV Core Antibody         | Liver             |                     |                                    |                   |
| TCGA-DD-A3A7        | Hepatitis B Surface Antigen HBV Surface Antibody HBV Core Antibody         | Liver             |                     |                                    |                   |
| TCGA-DD-A3A8        | Hepatitis B Surface Antigen HBV Surface Antibody HBV Core Antibody         | Liver             |                     |                                    |                   |
| TCGA-DD-A4NA        | Hepatitis B Surface Antigen HBV Surface Antibody                           | Liver             |                     |                                    |                   |
| TCGA-DD-A4NG        | Hepatitis B Surface Antigen HBV Surface Antibody HBV Core Antibody         | Liver             |                     |                                    |                   |
| TCGA-DD-A4NH        | Hepatitis B Surface Antigen                                                | Liver             |                     |                                    |                   |
| TCGA-DD-A4NI        | Hepatitis B Surface Antigen HBV Surface Antibody HBV Core Antibody         | Liver             |                     |                                    |                   |
| TCGA-DD-A4NJ        | Hepatitis B Surface Antigen HBV Surface Antibody HBV Core Antibody         | Liver             |                     |                                    |                   |
| TCGA-DD-A4NK        | Hepatitis B Surface Antigen                                                | Liver             |                     |                                    |                   |
| TCGA-DD-A4NL        | Hepatitis B Surface Antigen HBV Surface Antibody HBV Core Antibody         | Liver             |                     |                                    |                   |
| TCGA-DD-A4NP        | Hepatitis B Surface Antigen HBV Surface Antibody HBV Core Antibody         | Liver             |                     |                                    |                   |
| TCGA-DD-A4NR        | Hepatitis B Surface Antigen HBV Surface Antibody HBV Core Antibody         | Liver             |                     |                                    |                   |
| TCGA-DD-A4NS        | Hepatitis B Surface Antigen HBV Surface Antibody HBV Core Antibody         | Liver             |                     |                                    |                   |
| TCGA-DD-A4NV        | Hepatitis B Surface Antigen HBV Surface Antibody HBV Core Antibody         | Liver             |                     |                                    |                   |
| TCGA-DD-A73A        | Hepatitis B Surface Antigen HBV Surface Antibody HBV Core Antibody         | Liver             |                     |                                    |                   |
| TCGA-DD-A73B        | Hepatitis B Surface Antigen                                                | Liver             |                     |                                    |                   |
| TCGA-DD-A73C        | Hepatitis B Surface Antigen HBV Surface Antibody HBV Core Antibody         | Liver             |                     |                                    |                   |
| TCGA-DD-A73E        | Hepatitis B Surface Antigen HBV Surface Antibody                           | Liver             |                     |                                    |                   |
| TCGA-DD-A73G        | Hepatitis B Surface Antigen HBV Surface Antibody HBV Core Antibody         | Liver             |                     |                                    |                   |
| TCGA-DD-AA3A        | Hepatitis B Surface Antigen HBV Surface Antibody HBV Core Antibody         | Liver             |                     |                                    |                   |
| TCGA-ED-A459        | Hepatitis B Surface Antigen                                                | Liver             |                     |                                    |                   |
| TCGA-ED-A4XI        | Hepatitis B Surface Antigen                                                | Liver             |                     |                                    |                   |
| TCGA-ED-A5KG        | Hepatitis B Surface Antigen                                                | Liver             |                     |                                    |                   |
| TCGA-ED-A66X        | Hepatitis B Surface Antigen                                                | Liver             |                     |                                    |                   |
| TCGA-ED-A66Y        | Hepatitis B Surface Antigen                                                | Liver             |                     |                                    |                   |
| TCGA-ED-A7PX        | Hepatitis B Surface Antigen                                                | Liver             |                     |                                    |                   |
| TCGA-ED-A7PY        | Hepatitis B Surface Antigen                                                | Liver             |                     |                                    |                   |
| TCGA-ED-A7PZ        | Hepatitis B Surface Antigen                                                | Liver             |                     |                                    |                   |
| TCGA-ED-A7XP        | Hepatitis B Surface Antigen                                                | Liver             |                     |                                    |                   |
| TCGA-ED-A97K        | Hepatitis B Surface Antigen                                                | Liver             |                     |                                    |                   |
| TCGA-G3-AAV6        | Hepatitis B Surface Antigen                                                | Liver             |                     |                                    |                   |
| TCGA-G3-AAV7        | Hepatitis B Surface Antigen HBV Surface Antibody HBV DNA                   | Liver             |                     |                                    |                   |
| TCGA-MI-A75C        | HBV Surface Antibody                                                       | Liver             |                     |                                    |                   |
| TCGA-UB-A7ME        | Hepatitis B Surface Antigen HBV Core Antibody HBV DNA                      | Liver             |                     |                                    |                   |
| TCGA-ZP-A9CZ        | Hepatitis B Surface Antigen                                                | Liver             |                     |                                    |                   |
