# Supplementary material for: A comprehensive genome-wide profiling comparison between HBV and HCV infected hepatocellular carcinoma
Source: PubMed Central journal article supplement (PMC6819460; doi:10.1186/s12920-019-0580-x), 2019-10-28
Supplement: 12920_2019_580_MOESM4_ESM.pdf [file 12920_2019_580_MOESM4_ESM.pdf]

Table S4 25 cis-reated genes RNA expression FPKM value

| HBV 25 genes FPKM |          |          |          |          |          |          |           |          |          |          |          |          |          |          |          |          |          |          |          |          |          |          |          |          |          |
|-------------------|----------|----------|----------|----------|----------|----------|-----------|----------|----------|----------|----------|----------|----------|----------|----------|----------|----------|----------|----------|----------|----------|----------|----------|----------|----------|
| Tags              | PIGB     | ITM2A    | ANKRD27  | RAB3D    | OAS2     | RASAL1   | AIM1      | STAT1    | EGLN3    | ZC3H4    | AGAP3    | IFI44L   | HERC5    | PRICKLE1 | RSPH10B  | B3GNT7   | DEGS2    | RSPH10B2 | PARP14   | GALNTL6  | CCDC149  | CSMD1    | BCOR     | RGS9BP   | HLA-A    |
| TCGA-ED-A97K-01   | 0.136989 | 0.562921 | 0.153518 | 0.211999 | 0.666971 | 0.160878 | 0.0202319 | 1.101014 | 0.020931 | 0.403108 | 0.536782 | 0.301733 | 0.060673 | 0.013971 | 0.000608 | 1.467206 | 0.355681 | 0.000152 | 0.84714  | 3.90E-05 | 0.064515 | 0        | 0.114857 | 0.018954 | 74.1415  |
| TCGA-DD-A3A6-01   | 0.014838 | 0.22692  | 0.026536 | 0.024368 | 0.209196 | 0.001402 | 0.040521  | 0.182509 | 0.000414 | 0.202862 | 0.483374 | 0.04352  | 0.040253 | 0.030605 | 0.000872 | 0.064167 | 0.005249 | 0        | 0.145095 | 7.47E-05 | 0.017331 | 0        | 0.012551 | 0.022664 | 186.2322 |
| TCGA-DD-A116-01   | 0.072742 | 0.059066 | 0.041133 | 0.06993  | 0.248293 | 0.002695 | 0.029025  | 0.431949 | 0.001535 | 0.100906 | 0.507345 | 0.050244 | 0.031113 | 0.001324 | 0.000298 | 0.078919 | 0.020542 | 0        | 0.35163  | 1.64E-05 | 0.018342 | 0        | 0.030841 | 0.013937 | 117.8502 |
| TCGA-BD-A3ER-01   | 0.062139 | 0.417318 | 0.050039 | 0.02527  | 0.227588 | 0.006581 | 0.05812   | 0.838734 | 0.006036 | 0.134295 | 0.313126 | 0.024417 | 0.019081 | 0.003305 | 0        | 0.068837 | 0.004095 | 0        | 0.571764 | 5.72E-06 | 0.020169 | 2.73E-05 | 0.03791  | 0        | 89.35747 |
| TCGA-ED-A66X-01   | 0.113714 | 0.248914 | 0.202898 | 0.455232 | 0.41024  | 0.061302 | 0.036265  | 1.357269 | 0.004103 | 0.233635 | 0.330766 | 0.028902 | 0.024114 | 0.0127   | 0.000576 | 0.153736 | 0.02033  | 0.000287 | 0.617723 | 1.06E-05 | 0.021651 | 0        | 0.092395 | 0.004491 | 81.76048 |
| TCGA-DD-A4NR-01   | 0.083689 | 0.623945 | 0.111315 | 0.02708  | 1.296659 | 0.013916 | 0.13827   | 3.444946 | 0.008313 | 0.234143 | 0.364202 | 0.245261 | 0.049227 | 0.001178 | 0.00045  | 0.309164 | 0.003936 | 0.000299 | 0.818205 | 0        | 0.025563 | 0.000867 | 0.048424 | 0.023369 | 101.8021 |
| TCGA-DD-A4NP-01   | 0.055502 | 0.086936 | 0.040197 | 0.014864 | 0.148646 | 0.000332 | 0.034751  | 0.311349 | 0.000815 | 0.111058 | 0.23969  | 0.036774 | 0.048015 | 0.001285 | 9.17E-05 | 0.025767 | 0.006625 | 0        | 0.35296  | 6.73E-06 | 0.008559 | 0        | 0.021033 | 0.005721 | 69.07555 |
| TCGA-DD-A11A-01   | 0.042472 | 0.084101 | 0.105064 | 0.017922 | 0.045861 | 0.000954 | 0.125858  | 0.662491 | 0.000806 | 0.131031 | 0.299679 | 0.016329 | 0.022433 | 0.000496 | 0.000791 | 0.048663 | 0.073127 | 0        | 0.458648 | 0.000585 | 0.009771 | 0.000104 | 0.042724 | 0.018496 | 36.35499 |
| TCGA-ED-A7PY-01   | 0.052967 | 0.060101 | 0.033002 | 0.077574 | 0.034279 | 0.015693 | 0.00656   | 1.347437 | 0.004401 | 0.235453 | 0.157412 | 0.02728  | 0.005225 | 0.001213 | 0.002129 | 0.068372 | 0.021751 | 0        | 0.37035  | 8.69E-06 | 0.012021 | 0        | 0.046054 | 0.011069 | 19.07857 |
| TCGA-DD-A4NS-01   | 0.073178 | 0.937356 | 0.089044 | 0.071763 | 0.253022 | 0.010678 | 0.133268  | 0.903321 | 0.003619 | 0.242547 | 0.438736 | 0.119755 | 0.043735 | 0.029576 | 0.000777 | 1.477553 | 0.14331  | 0.000155 | 0.62977  | 6.27E-06 | 0.018684 | 0.0005   | 0.086913 | 0.004844 | 56.207   |
| TCGA-DD-A11B-01   | 0.032362 | 0.241698 | 0.076059 | 0.012796 | 1.158995 | 0.065646 | 0.020063  | 0.256058 | 0.001759 | 0.152959 | 0.378445 | 0.036578 | 0.031721 | 0.003278 | 0        | 0.022888 | 0.091915 | 0        | 0.348795 | 0.000262 | 0.017034 | 4.54E-05 | 0.026007 | 0.040421 | 94.0672  |
| TCGA-ED-A5KG-01   | 0.181125 | 3.927934 | 0.143305 | 0.166917 | 3.144969 | 0.045203 | 0.412664  | 6.791388 | 0.009752 | 0.393597 | 0.318041 | 3.347718 | 0.449001 | 0.018731 | 0.000535 | 0.346725 | 0.05157  | 0        | 1.541442 | 1.97E-05 | 0.019202 | 7.04E-05 | 0.178009 | 0.00835  | 161.6836 |
| TCGA-DD-A11C-01   | 0.068865 | 0.138747 | 0.085063 | 0.050446 | 0.242584 | 0.000413 | 0.219374  | 1.33565  | 0.001618 | 0.175393 | 0.258141 | 0.03264  | 0.065496 | 0.001289 | 0        | 0.046775 | 0.001876 | 0        | 0.684079 | 0        | 0.010633 | 0.001157 | 0.05831  | 0.008909 | 104.2745 |
| TCGA-DD-A39Y-01   | 0.041243 | 0.103111 | 0.111503 | 0.004103 | 0.072078 | 0.002066 | 0.044672  | 0.384309 | 0.023237 | 0.145176 | 0.710028 | 0.038538 | 0.019366 | 0.000544 | 0        | 0.039292 | 0.002411 | 0        | 0.422243 | 0        | 0.033626 | 2.95E-05 | 0.033867 | 0.026716 | 61.36464 |
| TCGA-DD-AA3A-01   | 0.1212   | 0.071607 | 0.10252  | 0.206914 | 0.090714 | 0.206947 | 0.011013  | 1.633041 | 0.00128  | 0.311944 | 0.41452  | 0.006742 | 0.003064 | 0.004018 | 0.001567 | 1.968722 | 0.016722 | 0.000586 | 0.53106  | 1.44E-05 | 0.030316 | 6.01E-05 | 0.118551 | 0.003055 | 155.5734 |
| TCGA-DD-A11B-01   | 0.115299 | 0.251183 | 0.048598 | 0.118611 | 1.334179 | 0        | 0.30113   | 0.801149 | 0.001482 | 0.156941 | 0.158713 | 0.016857 | 0.023283 | 0.002279 | 0.000136 | 0.024026 | 0.029481 | 0        | 0.418209 | 0        | 0.010439 | 0.002218 | 0.068467 | 0        | 19.00701 |
| TCGA-ED-A66Y-01   | 0.05748  | 0.042748 | 0.058417 | 0.389407 | 0.028665 | 0.203486 | 0.010145  | 0.531358 | 0.005795 | 0.302256 | 0.657617 | 0.005397 | 0.010677 | 0.00075  | 0.000157 | 0.005035 | 0.01905  | 0        | 0.298725 | 1.15E-05 | 0.018374 | 1.03E-05 | 0.178537 | 0        | 6.80292  |
| TCGA-DD-A73B-01   | 0.047056 | 0.078737 | 0.041618 | 0.012321 | 0.064266 | 0        | 0.353751  | 0.559866 | 0.006966 | 0.123029 | 0.151285 | 0.003571 | 0.106791 | 8.87E-05 | 0.00013  | 0.026024 | 0.043429 | 0        | 0.896783 | 0.000257 | 0.010522 | 0        | 0.072193 | 0        | 62.17838 |
| TCGA-DD-A73G-01   | 0.020747 | 0.019992 | 0.012891 | 0.294549 | 0.075667 | 0.011851 | 0.008359  | 0.252824 | 0.000344 | 0.084933 | 0.293652 | 0.015902 | 0.004454 | 0.001053 | 0.000147 | 0.335549 | 0.042378 | 0        | 0.282964 | 5.92E-05 | 0.018517 | 0        | 0.00815  | 0        | 34.05319 |
| TCGA-DD-A1EF-01   | 0.065635 | 0.397036 | 0.066157 | 1.062064 | 0.116156 | 0.002771 | 0.068624  | 0.784102 | 0.00276  | 0.344268 | 0.261281 | 0.04877  | 0.010571 | 0.004538 | 0.000511 | 0.069681 | 0.02431  | 0.000255 | 0.863979 | 0        | 0.015355 | 0        | 0.178998 | 0        | 26.63624 |
| TCGA-DD-A4NG-01   | 0.042092 | 0.136649 | 0.093301 | 0.008467 | 0.127964 | 0.000645 | 0.04437   | 0.406155 | 0.004626 | 0.140691 | 0.469781 | 0.24614  | 0.060143 | 0.000503 | 0.000134 | 0.040774 | 0.042133 | 0        | 0.355414 | 0        | 0.008386 | 1.17E-05 | 0.080139 | 0.016676 | 59.09038 |
| TCGA-DD-A1EL-01   | 0.058906 | 0.097889 | 0.211557 | 0.114443 | 0.147629 | 0.013255 | 0.033935  | 1.43879  | 0.006908 | 0.196749 | 0.248013 | 0.088493 | 0.011919 | 0.000839 | 0.000392 | 0.045689 | 0.000644 | 9.79E-05 | 0.65501  | 2.52E-05 | 0.046936 | 0.000946 | 0.115689 | 0.019894 | 68.15352 |
| TCGA-2Y-A9GX-01   | 0.081716 | 0.594176 | 0.087796 | 0.033002 | 0.370886 | 0.006163 | 0.192719  | 1.593208 | 0.004539 | 0.169517 | 0.406496 | 0.099668 | 0.125388 | 0.008443 | 0.000511 | 0.194167 | 0.008949 | 0        | 1.416152 | 1.88E-05 | 0.022344 | 3.73E-05 | 0.056548 | 0        | 114.3147 |
| TCGA-DD-A4NL-01   | 0.044252 | 0.317516 | 0.029347 | 0.028136 | 0.104778 | 0.000819 | 0.096713  | 0.410087 | 0.001365 | 0.139982 | 0.150144 | 0.028327 | 0.022328 | 0.003016 | 0        | 0.064023 | 0.017829 | 0        | 0.283622 | 0        | 0.013637 | 0        | 0.033092 | 0        | 48.52261 |
| TCGA-DD-A3A7-01   | 0.00824  | 0.01953  | 0.060436 | 0.22829  | 1.330717 | 0.047045 | 0.039603  | 0.503598 | 0.001403 | 0.084309 | 0.352122 | 0.005086 | 0.056015 | 0.000471 | 0.000197 | 0.018978 | 0.069215 | 0        | 0.198632 | 5.06E-05 | 0.018182 | 3.02E-05 | 0.016595 | 0.089096 | 173.5714 |
| TCGA-MI-A75C-01   | 0.063309 | 0.019558 | 0.058289 | 0.006392 | 1.334179 | 0.024001 | 0.116487  | 0.978187 | 0.001426 | 0.133088 | 0.555396 | 0.133451 | 0.053293 | 0        | 0.000549 | 0.019831 | 0.011717 | 0        | 0.53587  | 0        | 0.015228 | 3.01E-06 | 0.028513 | 0.034245 | 64.84902 |
| TCGA-BC-A10W-01   | 0.037962 | 0.124564 | 0.145802 | 0.192996 | 0.153976 | 0.019768 | 0.032842  | 1.226522 | 0.029092 | 0.25441  | 0.32709  | 0.015647 | 0.077885 | 0.000394 | 0        | 0.635274 | 0.043727 | 0        | 1.137923 | 0        | 0.050127 | 0        | 0.123591 | 0.005991 | 36.99775 |
| TCGA-DD-A1ED-01   | 0.043549 | 0.344795 | 0.035361 | 0.034491 | 0.161558 | 0.000783 | 0.073296  | 0.526918 | 0.001669 | 0.137715 | 0.185005 | 0.071176 | 0.056286 | 0.001554 | 0        | 0.106032 | 0.003555 | 0.000108 | 0.340999 | 3.97E-06 | 0.012434 | 0        | 0.044794 | 0        | 52.33213 |
| TCGA-ED-A7XP-01   | 0.098783 | 0.413033 | 0.150321 | 0.030326 | 0.283189 | 0.006918 | 0.020418  | 0.947704 | 0.001104 | 0.184633 | 0.398025 | 0.040821 | 0.049215 | 0.006042 | 0.00062  | 0.080893 | 0.043776 | 0        | 1.253516 | 1.71E-05 | 0.043204 | 3.40E-06 | 0.054155 | 0.019341 | 86.22372 |
| TCGA-5C-AAPD-01   | 0.046368 | 0.65022  | 0.067234 | 0.074841 | 0.352745 | 0.002348 | 0.074829  | 1.744032 | 0.002936 | 0.112956 | 0.327754 | 0.084059 | 0.014981 | 0.002057 | 0.000354 | 0.109389 | 0.165606 | 0        | 0.425081 | 0        | 0.013626 | 0.001923 | 0.08011  | 0.00552  | 79.91856 |
| TCGA-DD-A1EB-01   | 0.056888 | 0.207557 | 0.057994 | 0.02789  | 0.274777 | 0.000536 | 0.124779  | 2.206733 | 0.006633 | 0.23524  | 0.55463  | 0.043366 | 0.032325 | 0.001469 | 0.000296 | 0.022608 | 0.012167 | 0        | 0.674112 | 5.44E-06 | 0.009645 | 3.25E-06 | 0.064055 | 0.006935 | 108.7298 |
| TCGA-DD-A119-01   | 0.021936 | 0.247742 | 0.032706 | 0.02881  | 0.420321 | 0.013778 | 0.008155  | 0.651948 | 0.00258  | 0.123683 | 0.298579 | 0.027573 | 0.065508 | 0.003477 | 0.000139 | 0.041381 | 0.015096 | 0.000139 | 0.28006  | 1.53E-05 | 0.012172 | 3.05E-06 | 0.028451 | 0.002173 | 100.2489 |
| TCGA-DD-A4NK-01   | 0.060707 | 0.172439 | 0.039637 | 0.015977 | 0.092463 | 0.000585 | 0.038509  | 0.333114 | 0.000136 | 0.233371 | 0.43487  | 0.049011 | 0.06968  | 0.001383 | 0.000485 | 0.025979 | 0.002125 | 0        | 0.758713 | 2.97E-05 | 0.001804 | 1.42E-05 | 0.068779 | 0        | 20.0588  |
| TCGA-DD-A1EH-01   | 0.131041 | 0.16958  | 0.100744 | 0.33341  | 0.104794 | 0.063172 | 0.018627  | 2.022816 | 0.00085  | 0.336322 | 0.305975 | 0.025582 | 0.006188 | 0.002944 | 0        | 0.115538 | 0.036412 | 0.000118 | 1.898775 | 4.33E-06 | 0.013671 | 1.03E-05 | 0.18167  | 0.00184  | 18.18755 |
| TCGA-DD-A4NH-01   | 0.126008 | 0.058407 | 0.090336 | 0.489686 | 0.232958 | 0.022738 | 0.023112  | 1.164883 | 0.032784 | 0.202851 | 0.309125 | 0.019198 | 0.028191 | 0.00145  | 0.001571 | 0.345577 | 0.042817 | 0.000627 | 0.47734  | 4.04E-05 | 0.038694 | 3.10E-05 | 0.073122 | 0.026951 | 141.0018 |
| TCGA-BD-A2L6-01   | 0.040534 | 0.293128 | 0.040907 | 0.011182 | 0.109958 | 0.000426 | 0.122003  | 0.58074  | 0.000414 | 0.195989 | 0.289463 | 0.023899 | 0.065299 | 0.001126 | 0.000353 | 0.013226 | 0.045597 | 0.000822 | 0.324454 | 0        | 0.001953 | 0.003159 | 0.052149 | 0.003671 | 108.8547 |
| TCGA-UB-A7ME-01   | 0.047073 | 0.536132 |          |          |          |          |           |          |          |          |          |          |          |          |          |          |          |          |          |          |          |          |          |          |          |
