# Supplementary material for: A comprehensive genome-wide profiling comparison between HBV and HCV infected hepatocellular carcinoma
Source: PubMed Central journal article supplement (PMC6819460; doi:10.1186/s12920-019-0580-x), 2019-10-28
Supplement: 12920_2019_580_MOESM6_ESM.pdf [file 12920_2019_580_MOESM6_ESM.pdf]

(A)

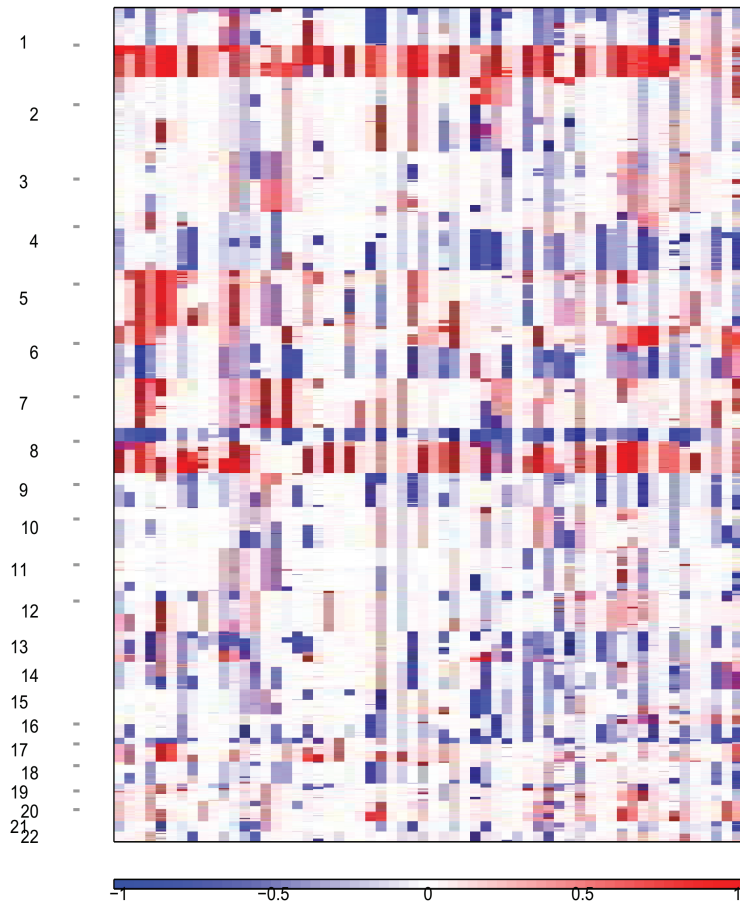

(B)

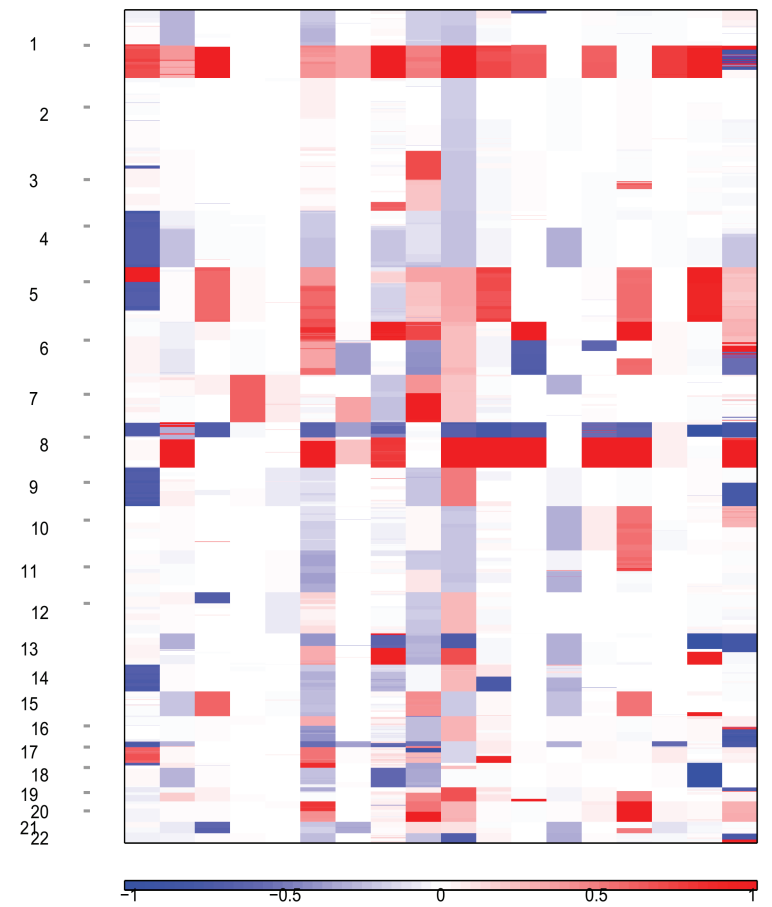

Figure S2. Heatmap of copy number variation in HBV (A) and HCV (B)
